# Supplementary material for: Nanofabrication of Au nanoparticles over conductive metallohydrogel nanofibers for nanocatalysis application
Source: Royal Society of Chemistry journal article supplement (doi:10.1039/c9qi01514k), 2020-01-01
Supplement: c9qi01514k1.pdf [file c9qi01514k1.pdf]

Supporting Information

**Nanofabrication of Au nanoparticles over conductive  
metallohydrogel nanofibers for nanocatalysis application**

**Manish Kumar Dixit, Déborah Chery, Chinthakuntla Mahendar, Christophe Bucher and  
Mrigendra Dubey\***

**Dr. Mrigendra Dubey, Chinthakuntla Mahendar**

*Soft Materials Research Laboratory, Discipline of Metallurgy Engineering and Materials  
Science, Indian Institute of Technology Indore, Khandwa Road, Simrol, Indore 453552, India  
E-mail: [mdubey@iiti.ac.in](mailto:mdubey@iiti.ac.in)*

**Dr. Christophe Bucher and Dr. Déborah Chery**

*Univ Lyon, Ens de Lyon, CNRS UMR 5182, Université Claude Bernard Lyon 1, Laboratoire de  
Chimie, Lyon, France*

**Mr. Manish Kumar Dixit**

*Department of Chemistry, Indian Institute of Technology (Banaras Hindu University), Varanasi  
221005, U.P., India.*

---

| <b><u>Table of Contents:</u></b>                                                  | <b><u>Pages</u></b> |
|-----------------------------------------------------------------------------------|---------------------|
| <b>EXPERIMENTAL SECTION</b>                                                       |                     |
| Rheological Study                                                                 | S2                  |
| Scheme S1: Synthetic procedure                                                    | S3                  |
| Table S1: Gelation ability of pro-ligand <b>1</b> and <b>2</b>                    | S3                  |
| Table S2: Gelation ability of pro-ligand <b>1</b> with alkali bases               | S3                  |
| <b>Supplementary Figures</b>                                                      |                     |
| Figure S1: $^{13}\text{C}$ and $^1\text{H}$ NMR spectrum of <b>1</b>              | S4                  |
| Figure S2: $^{13}\text{C}$ and $^1\text{H}$ NMR spectrum of <b>2</b>              | S5                  |
| Figure S3: Gel and sol pictures derived from <b>1</b> and <b>2</b>                | S5                  |
| Figure S4: Gel and sol pictures derived from <b>1</b> and <b>2</b> under UV light | S6                  |
| Figure S5: Properties of metallohydrogel                                          | S6                  |
| Figure S6: UV-vis spectrum of <b>1</b> , <b>CPH</b> and <b>AuCPH</b>              | S7                  |
| Figure S7: TEM images of diluted <b>CPH</b>                                       | S7                  |

|                                                                                                          |     |
|----------------------------------------------------------------------------------------------------------|-----|
| Figure S8: TEM images of diluted <b>AuCPH</b>                                                            | S7  |
| Figure S9: FE-SEM elemental maps for gold dispersion                                                     | S8  |
| Figure S10: Powder X-Ray Diffraction pattern of <b>1</b> (blue line) and xerogel                         | S8  |
| Figure S11: Fluorescence titration of KOH and CsOH deprotonated <b>1</b> with Zn <sup>2+</sup>           | S8  |
| Figure S12: Fluorescence titrations of <b>1</b>                                                          | S9  |
| Figure S13: Fluorescence titrations of <b>2</b> with Zn <sup>2+</sup> and <b>1</b> with Cu <sup>2+</sup> | S9  |
| Figure S14: TGA analysis over metallo gel                                                                | S10 |
| Figure S15: <sup>1</sup> H NMR titration of LiOH deprotonated <b>1</b> with Zn <sup>2+</sup>             | S11 |
| Figure S16: Model presentation for gel and sol formation from <b>1</b> and <b>2</b>                      | S11 |
| Figure S17: FTIR spectrum of <b>1</b> and <b>CPH</b>                                                     | S12 |
| Figure S18: FTIR spectrum of <b>CPH</b> and <b>AuCPH</b>                                                 | S12 |
| Figure S19: ESI-MS spectra of diluted metallohydrogel                                                    | S13 |
| Figure S20: Effect of H <sub>2</sub> AuCl <sub>4</sub> addition to <b>CPH</b>                            | S13 |
| Figure S21: Reduction using CPH and xerogel of AuCPH                                                     | S13 |
| Figure S22: Rheological study performed over <b>AuCPH</b>                                                | S14 |
| Figure S23: A schematic presentation of plausible mechanism behind gelation                              | S14 |

## EXPERIMENTAL SECTION

### Rheological Study:

The rheological measurements were performed on freshly prepared metallohydrogel with (AuCPH) and without AuNps (CPH) in triplicate. The measurements were carried out using a stress-controlled rheometer model *Anton Paar Quality Control Rheometer RheolabQC* instrument equipped with stainless steel parallel plates (20 mm diameter, 0.2 mm gap). Experiments were performed on freshly prepared metallohydrogel (1 % w/v). Linear viscoelastic regions of the metallo gel samples were determined by measuring the storage modulus,  $G'$  (associated with energy storage) and the loss modulus,  $G''$  (associated with the loss of energy) as a function of stress amplitude (Dynamic oscillatory frequency of 10 rad s<sup>-1</sup>). The following tests were performed: increasing amplitude of oscillation up to 100 % apparent strain on shear, time and frequency sweeps at 25 °C (20 min and range from 0.05 to 100 rad s<sup>-1</sup>, respectively) and a heating run to 100 °C at a scan rate of 5 °C min<sup>-1</sup>.

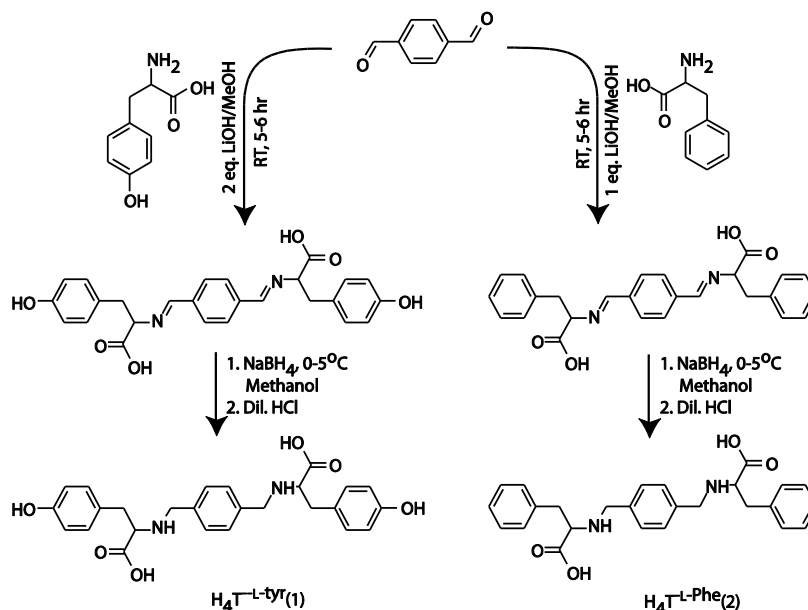

**Scheme S1.** Synthetic route adopted for the synthesis of **1** and **2**.

**Table S1.** Gelation details isomer, cation and solvent\*

| S.N. | Solvent      | 1+LiOH+Zn(NO <sub>3</sub> ) <sub>2</sub> | 2+LiOH+Zn(NO <sub>3</sub> ) <sub>2</sub> |
|------|--------------|------------------------------------------|------------------------------------------|
| 1.   | Water        | G                                        | GS                                       |
| 2.   | Acetonitrile | S                                        | S                                        |
| 3.   | Methanol     | S                                        | S                                        |
| 4.   | Ethanol      | S                                        | S                                        |
| 5.   | DMSO         | S                                        | S                                        |

\*Where, G= gel, GS= gelatinous solution and S= turbid sol.

**Table S2.** Gel or sol formation of **1** with different alkali bases and Zn(NO<sub>3</sub>)<sub>2</sub>

| Solvent | 1/Li <sup>+</sup> /Zn <sup>2+</sup> | 1/Na <sup>+</sup> /Zn <sup>2+</sup> | 1/K <sup>+</sup> /Zn <sup>2+</sup> | 1/Cs <sup>+</sup> /Zn <sup>2+</sup> |
|---------|-------------------------------------|-------------------------------------|------------------------------------|-------------------------------------|
| Water   | G                                   | WG                                  | WG                                 | S                                   |

\*Where, G= gel, WG= weak gel and S= sol.

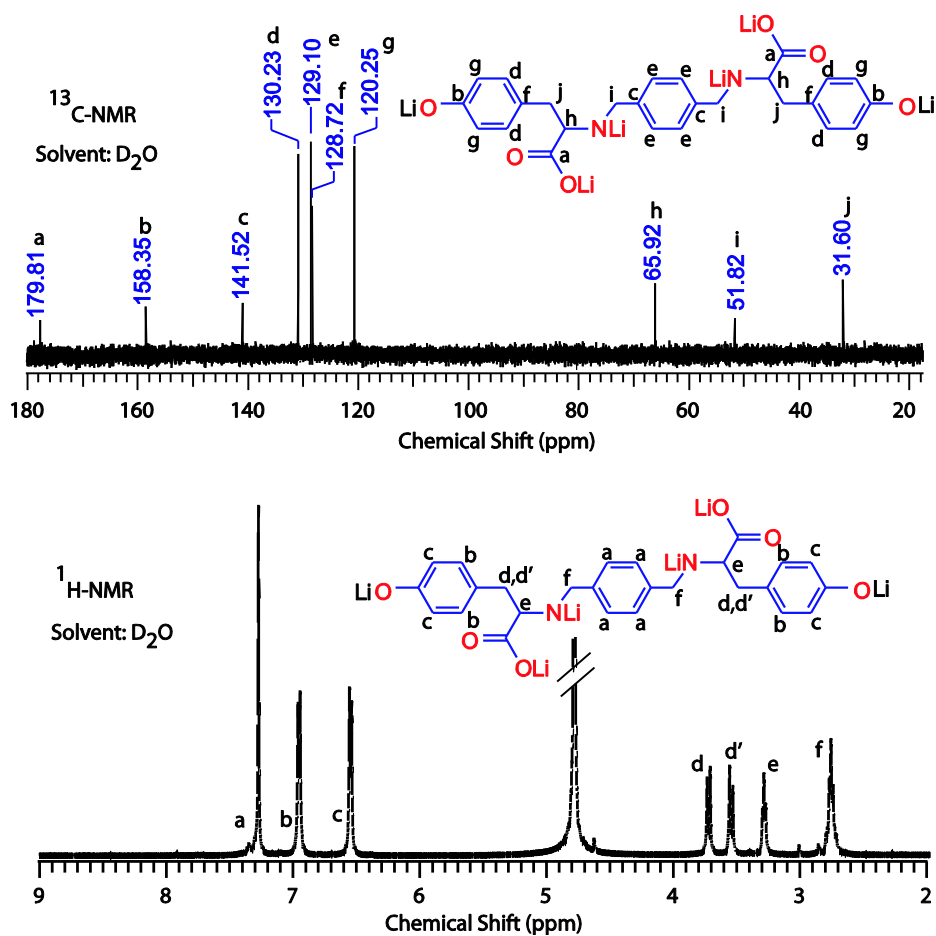

**Figure S1.** <sup>13</sup>C (above) and <sup>1</sup>H NMR (below) spectrum of LiOH deprotonated **1** (D<sub>2</sub>O). Chemical structure of **1** along with alphabetic assignment of carbons and protons, respectively, and its corresponding peak is shown in spectrum.

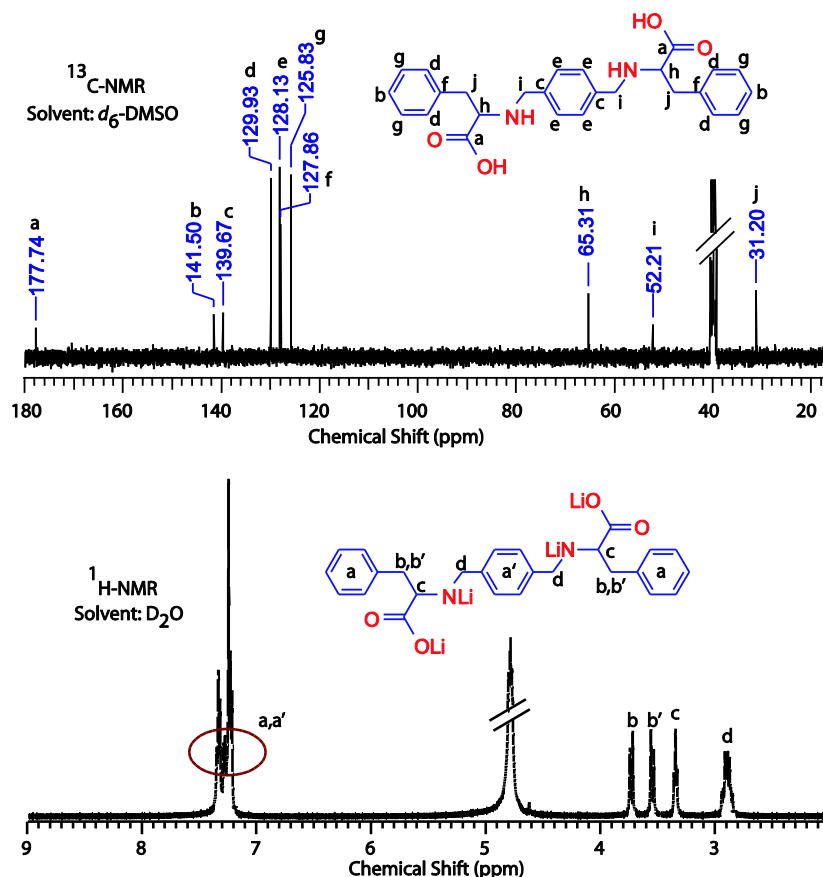

**Figure S2.** <sup>13</sup>C NMR (*d*<sub>6</sub>-DMSO; above) spectra of **2** and <sup>1</sup>H NMR (below) spectrum of LiOH deprotonated **2** (D<sub>2</sub>O). Chemical structure of **2** along with alphabetic assignment of carbons and protons, respectively, and its corresponding peak is shown in spectrum.

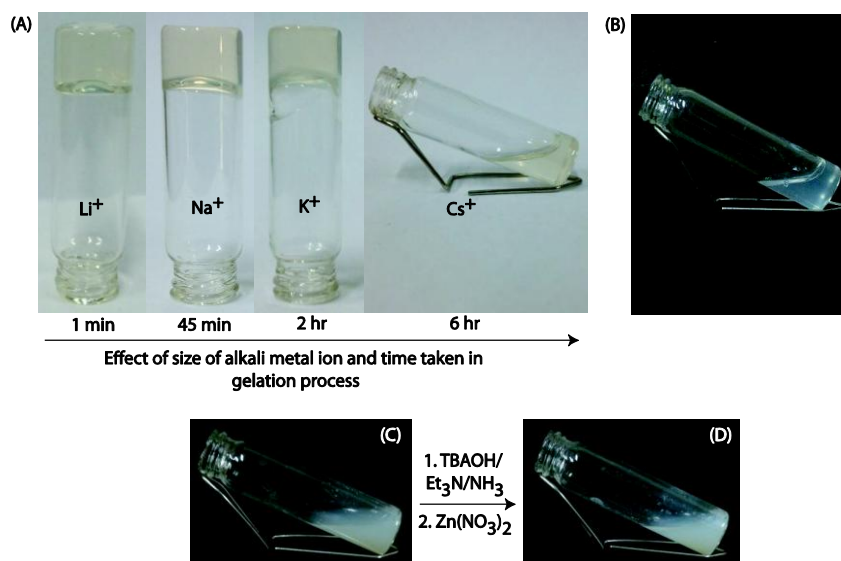

**Figure S3.** (A) Monitoring of gel strength and effect of size of alkali metal ions Li<sup>+</sup>, Na<sup>+</sup>, K<sup>+</sup> and Cs<sup>+</sup>. Moving from Li<sup>+</sup> to Cs<sup>+</sup> gelation time increases and weaken the strength of gel. (B) Gelatinous solution obtained when we replace H<sub>4</sub>T<sup>-L-tyr</sup> with H<sub>4</sub>T<sup>-L-Phe</sup> under similar gel

synthesis conditions, (C) and (D) Gelation test with other bases like TBAOH or Et<sub>3</sub>N or NH<sub>3</sub> produce turbid solutions.

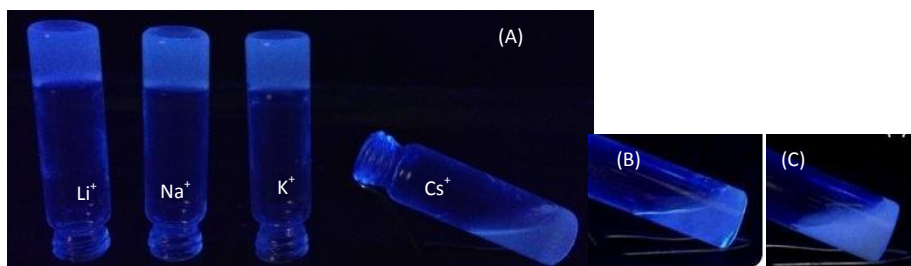

**Figure S4.** (A) Metallogel/solution under UV lamp ( $\lambda_{em}=365$  nm), (B) H<sub>4</sub>T<sup>L-Phe</sup> produced fluorescent gelatinous solution under similar conditions and (C) TBAOH deprotonated H<sub>4</sub>T<sup>L-Tyr</sup> produced fluorescent precipitate under similar condition to gelation.

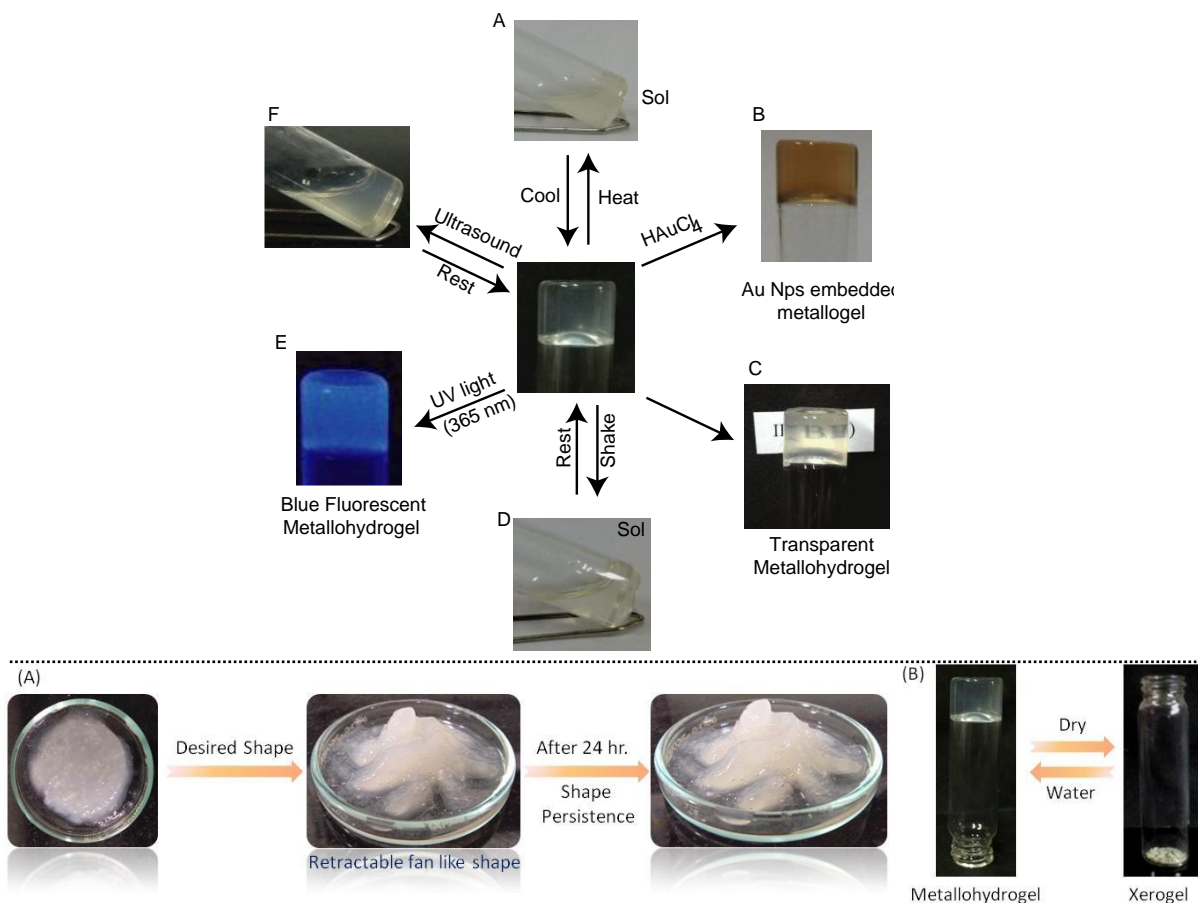

**Figure S5.** (Upper) Various properties of metallohydrogel- (A), (D) and (F) shows the multi-stimuli responsive behaviour of metallohydrogel towards external stimuli temperature, mechanical and ultrasound, (B) Au nanoparticle containing metallohydrogel (AuCPH), (C) The freshly prepared transparent metallogel, through which word is readable, (E) Blue fluorescent metallohydrogel under UV lamp (365 nm). (Lower) (A) Shape persistence

property of metallohydrogel which was retained even after 24 hrs and (B) Reswelling behaviour shown by metallohydrogel (CPH).

**Note:** Thermoreversibility was monitored at 70°C.

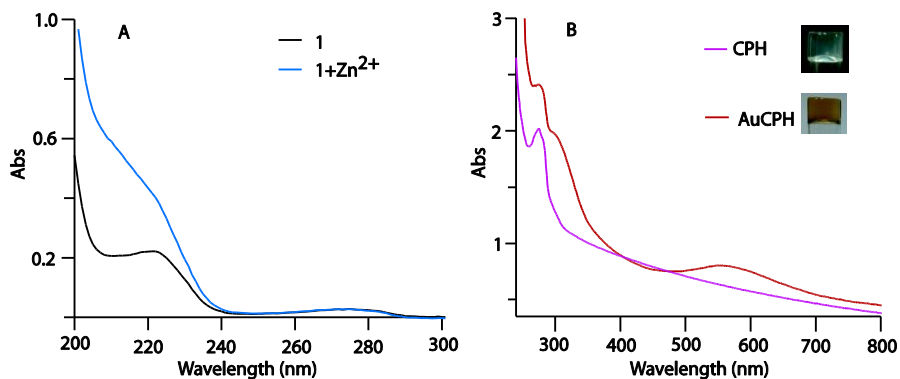

**Figure S6.** UV-vis spectra of (A) T<sup>-L-tyr</sup><sup>4-</sup> (1X10<sup>-5</sup>M, H<sub>2</sub>O, black line) and upon addition of Zn(NO<sub>3</sub>)<sub>2</sub> in blue line and (B) A comparison spectra of diluted AuCPH (red line) and CPH (violet line).

Note: AuCPH shows the characteristic plasmon band at *ca.* 560 nm for AuNPs.

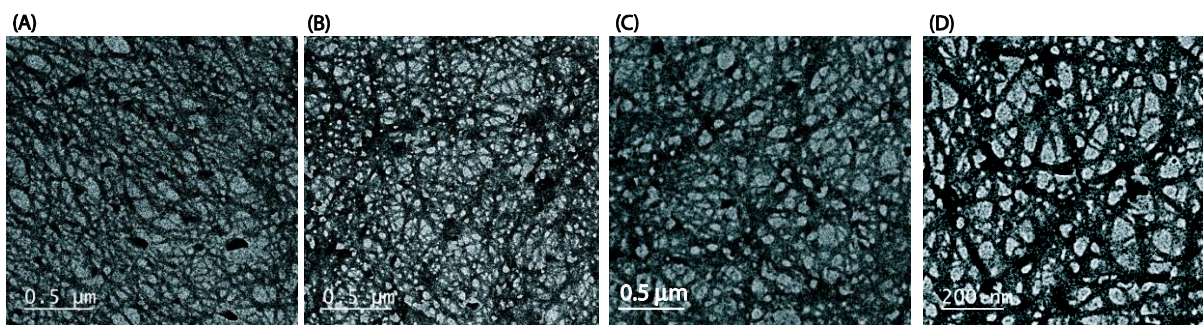

**Figure S7:** TEM images of diluted CPH (1X10<sup>-5</sup>M) at two different magnification.

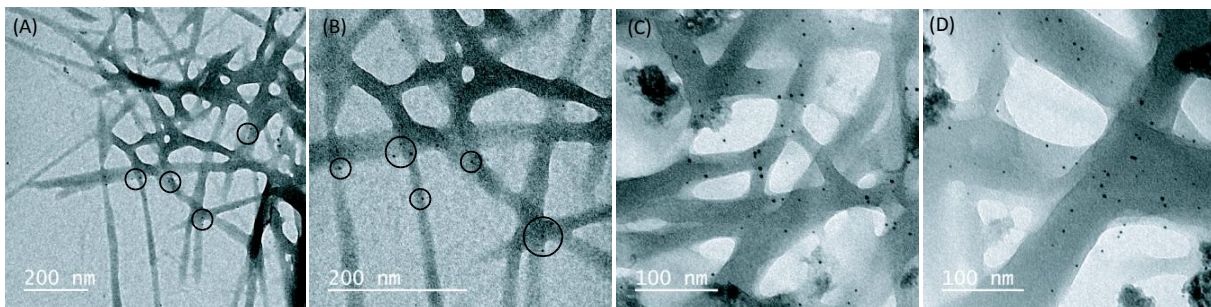

**Figure S8:** TEM images of diluted AuCPH captured at three different magnifications.

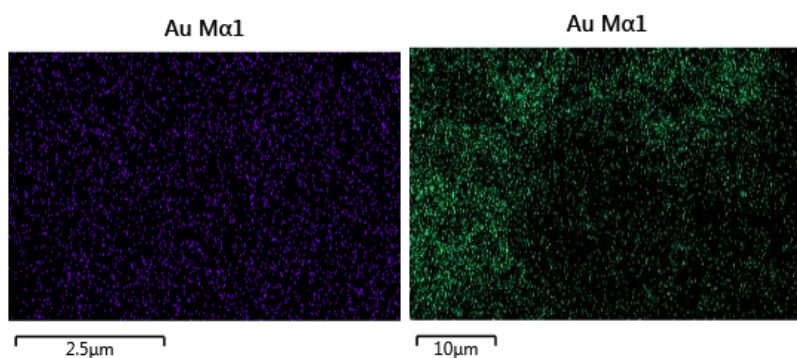

**Figure S9.** FE-SEM elemental maps for AuNPs dispersion in xerogel state performed twice to ensure the homogeneous dispersion. The colors in the element map are violet (left) and green (right) for AuNPs.

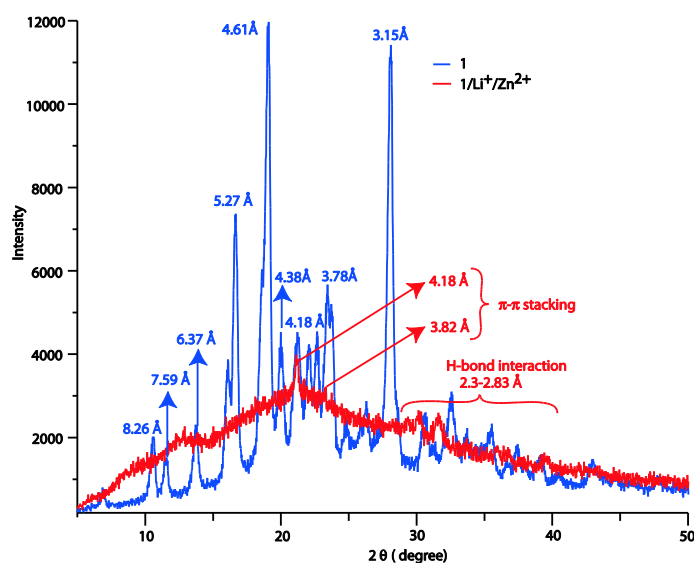

**Figure S10.** Powder X-Ray Diffraction pattern of **1** (blue line) and xerogel (Red line).

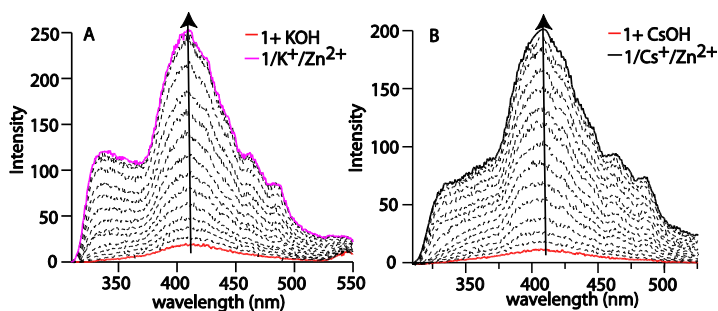

**Figure S11.** Fluorescence titration of (A) KOH deprotonated  $T^{L-tyr4-}$  ( $1 \times 10^{-2} M$ ,  $H_2O$ ,  $\lambda_{ex} = 275 \text{ nm}$ ) with  $Zn(NO_3)_2$  shows the gradual enhancement in intensity of the peak at 411 nm (stoke's shift =  $12000 \text{ cm}^{-1}$ ) and a new peak generation at 338 nm with no noticeable shift and (B) CsOH deprotonated  $T^{L-tyr4-}$  ( $1 \times 10^{-2} M$ ,  $H_2O$ ,  $\lambda_{ex} = 275 \text{ nm}$ ) produced the same fluorescence spectra.



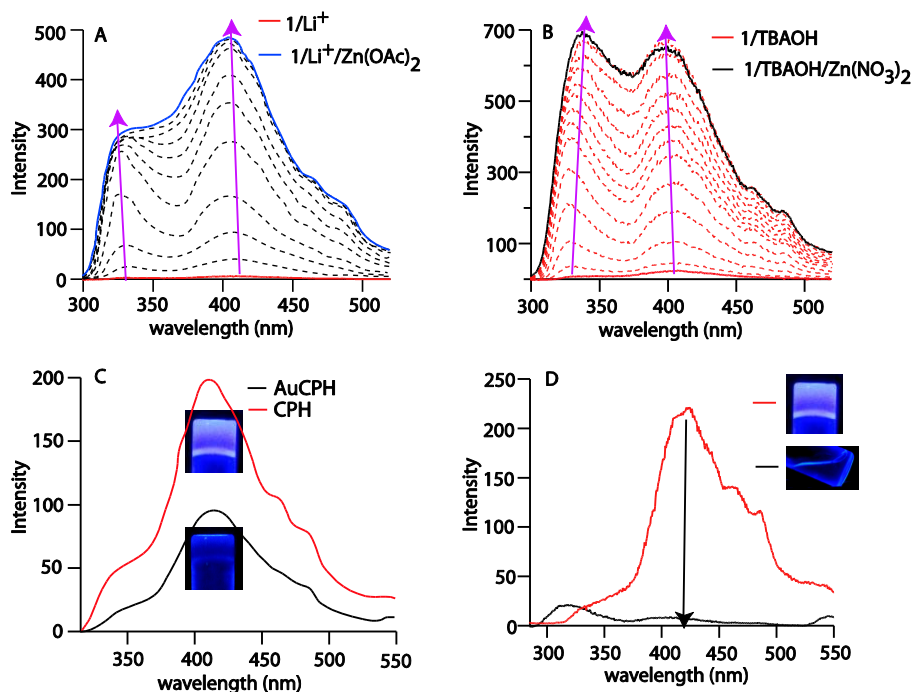

**Figure S12.** Fluorescence experiment (A) LiOH deprotonated  $T^{-L}\text{-tyr}^{4-}$  (red line) appears 330 nm and 408 nm which upon gradual addition of 1.2 equivalent of  $\text{Zn}(\text{OAc})_2$  (blue line) increases the emission intensity, (B) Fluorescence spectra of TBAOH deprotonated  $T^{-L}\text{-tyr}^{4-}$  ( $10^{-2}\text{M}$ ,  $\text{H}_2\text{O}$ ) with  $\text{Zn}(\text{NO}_3)_2$  shows enhancement in intensity with small red shift of 8 nm at 330 nm peak and small blue shift of 6 nm of 406 nm peak, (C) A comparative fluorescence spectra of CPH and AuCPH and (D) Fluorescence spectra of CPH upon treatment with HCl.

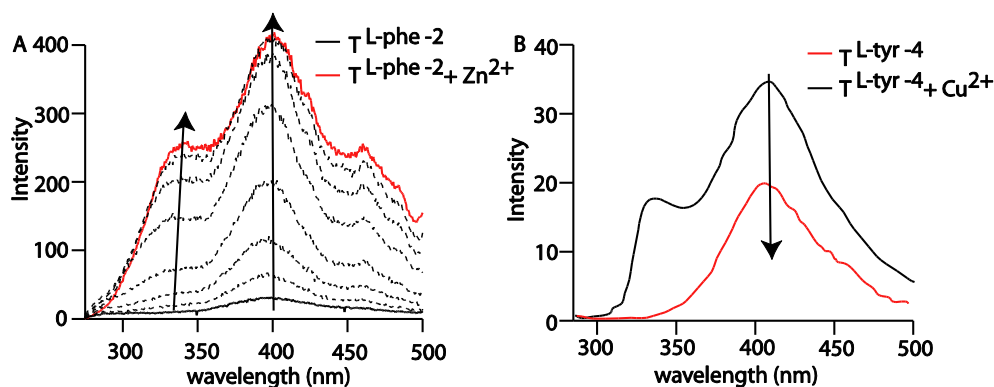

**Figure S13.** (A) Fluorescence spectra of LiOH deprotonated  $\text{H}_4T^{-L}\text{-Phe}$  ( $10^{-2}\text{M}$ ,  $\text{H}_2\text{O}$ ,  $\lambda_{\text{ex}} = 258$  nm) with  $\text{Zn}(\text{NO}_3)_2$  ( $1\text{M}$ ,  $\text{H}_2\text{O}$ ) and (B) Addition of  $\text{Cu}(\text{NO}_3)_2$  to  $T^{-L}\text{-tyr}^{4-}$  ( $10^{-2}\text{M}$ ,  $\text{H}_2\text{O}$ , LiOH deprotonated) produced nonfluorescent complex.

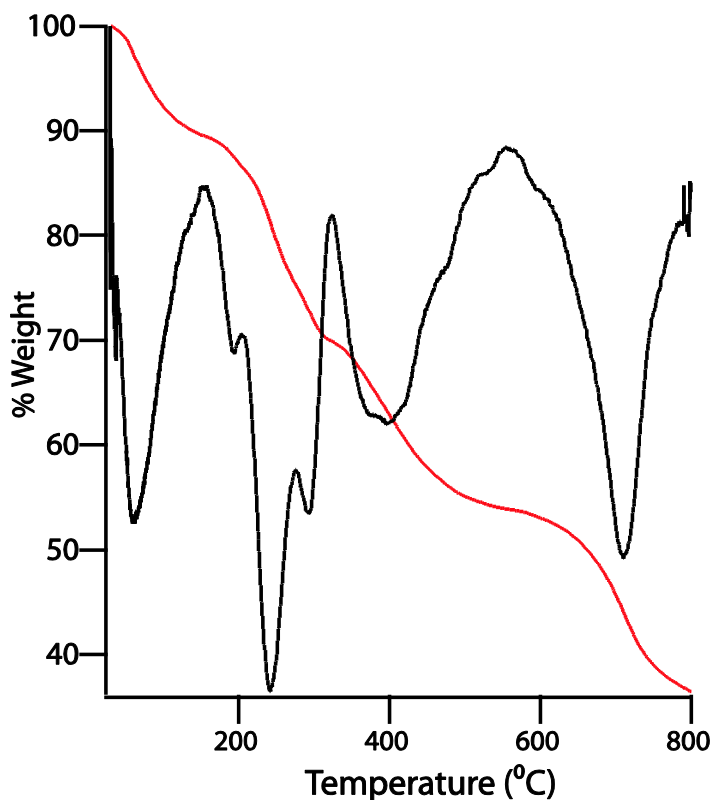

**Figure S14.** The Thermo Gravimetric Analysis (TGA, red line) along with derivative plot (black line) for the isolated compound from xerogel (washed with H<sub>2</sub>O to remove extra salts and vacuum dried) shows weight loss of 10.46 % close to the molecular weight of 3H<sub>2</sub>O (10.21 %). Three H<sub>2</sub>O molecules were removed up to nearly ~180°C from xerogel which was indicative towards the presence of water in strong interaction with gelator molecule.

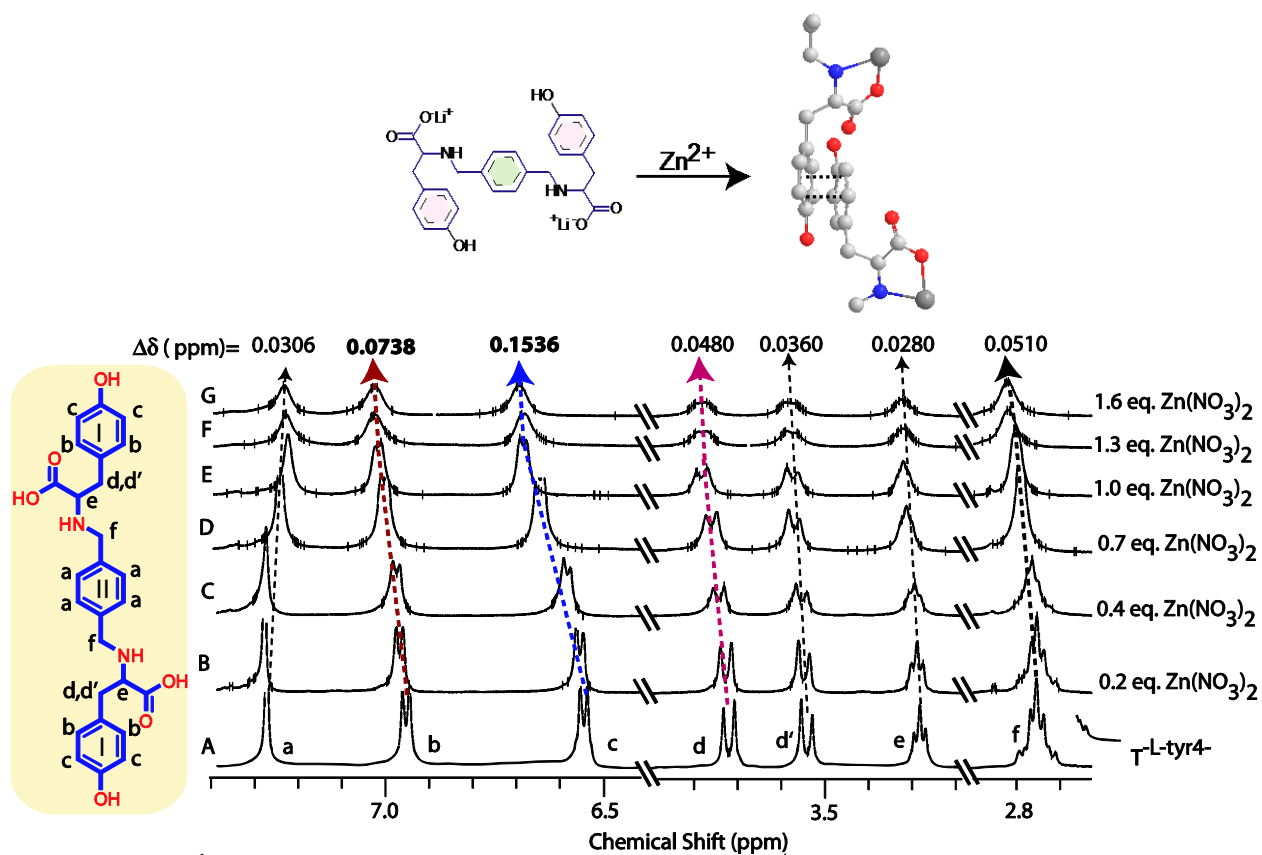

**Figure S15.**  $^1\text{H}$  NMR titration of deprotonated  $\text{T}^{-\text{L-tyr4-}}$  vs.  $\text{Zn}(\text{NO}_3)_2$  in  $\text{D}_2\text{O}$ .  $\text{H}_4\text{T}^{-\text{L-tyr}}$  structure along with labelling of proton (left side). The upper structure represent the result of  $^1\text{H}$  NMR titration as well as possibility of  $\pi$ - $\pi$  stacking between phenolic ring protons.

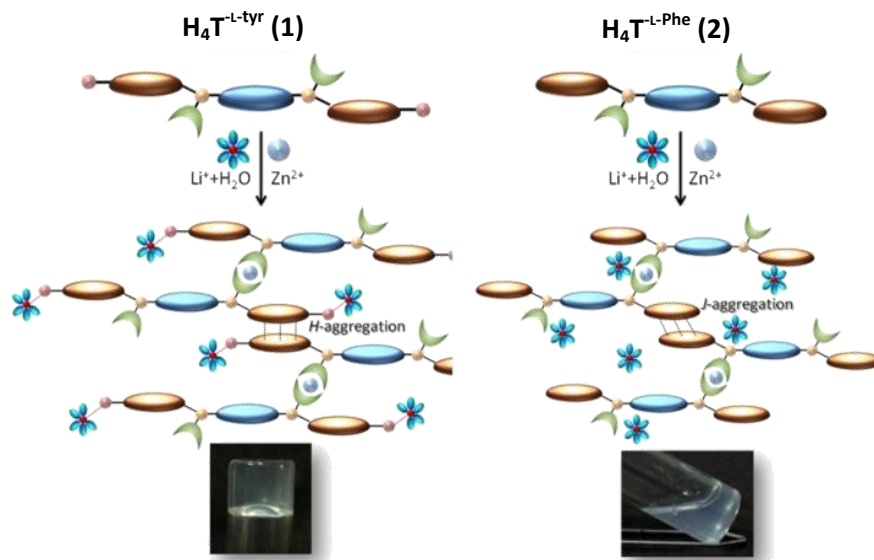

**Figure S16.** Model represents possibility of molecular arrangements for metallohydrogel and solution obtained from pro-ligands **1** and **2**, respectively.

Note: Gel formation fluorescence titration experiment (Figure 3B) suggests that after addition

of  $\text{Zn}(\text{NO}_3)_2$  to the deprotonated pro-ligand, molecules arrange themselves into a higher energy state *via* blue shift of 4 nm whereas deprotonated pro-ligand **2** shows red shift upon  $\text{Zn}^{2+}$  addition indicative towards the achievement of lower energy state *via* *J*-type aggregation.

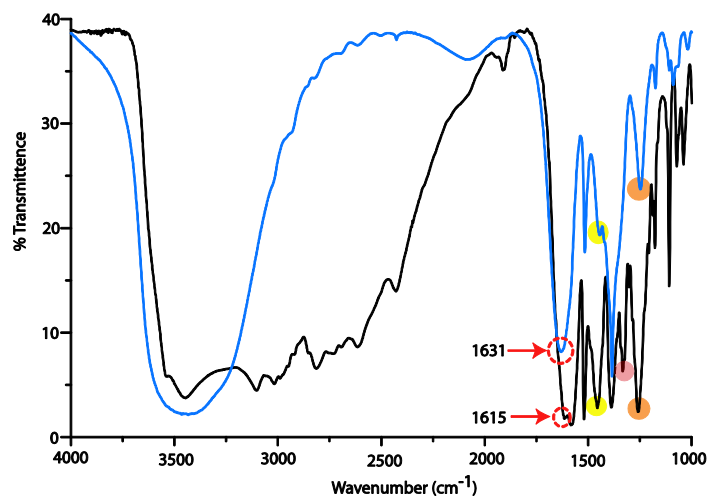

**Figure S17.** FTIR spectral overlap of  $\text{H}_4\text{T}^{-\text{L-tyr}}$  (**1**, black line) and CPH (blue line).

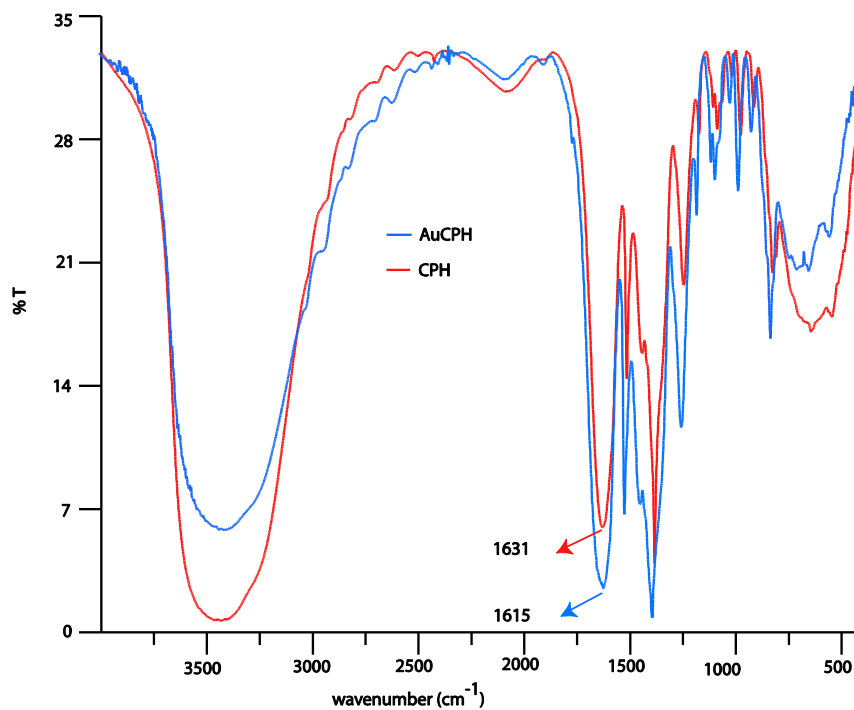

**Figure S18.** FTIR spectral overlap of CPH (red line) and AuCPH (blue line).

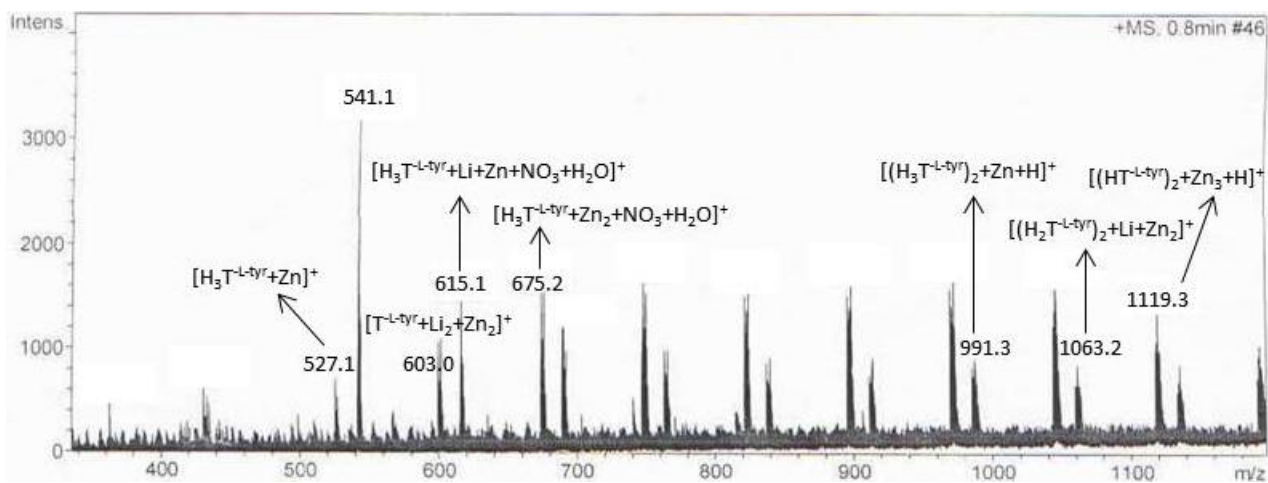

**Figure S19.** ESI-MS spectrum of diluted metallohydrogel (CPH) in positive mode along with labelling of molecular ion peaks.

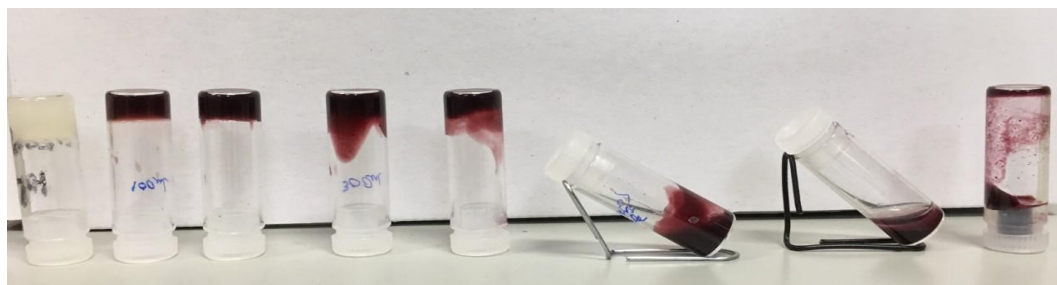

**Figure S20.** Effect of amount of  $\text{HAuCl}_4$  solution addition to metallohydrogel weakens the gel strength.

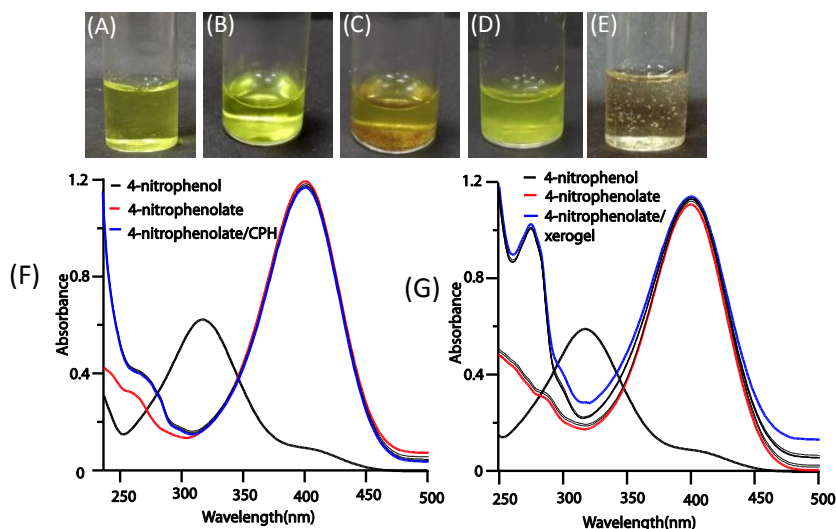

**Figure S21.** Pictures show (A) aqueous solution of 4-nitrophenol, the visual changes occurred upon addition of (B)  $\text{NaBH}_4$  to aqueous solution of 4-nitrophenol, (C) xerogel (obtained from AuCPH) to 4-NP/ $\text{NaBH}_4$  solution, (D) CPH to 4-NP/ $\text{NaBH}_4$  solution, (E)

AuCPH to 4-NP/NaBH<sub>4</sub> solution. UV-vis spectra of *aq.* 4-nitrophenol upon addition of (F) CPH and (G) dried AuCPH as catalytic material in presence of excess of NaBH<sub>4</sub> (100 equivalent of 4-nitrophenol).

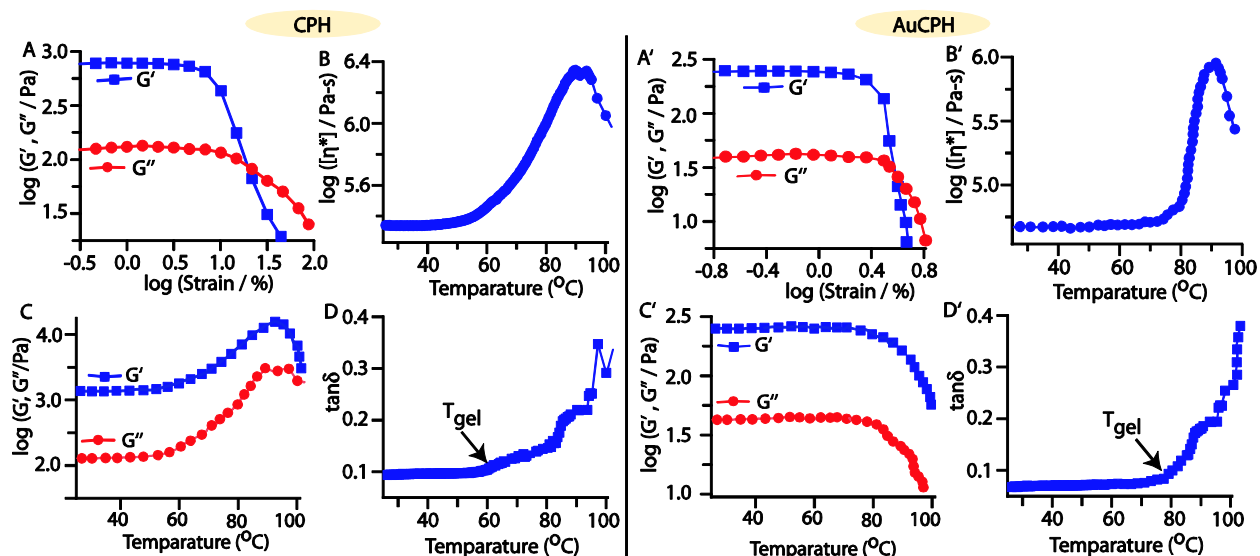

**Figure S22.** Rheology of CPH and AuCPH (A), (A') Dynamic strain sweep experiment at 10 rad s<sup>-1</sup> and temperature 25 °C; (D), (D') Dynamic temperature ramp of complex viscosity measurement at 5 °C min<sup>-1</sup>; (E), (E') Plot of G'' and G' on dynamic temperature ramp and (F), (F') Dynamic temperature ramp of the loss tangent ( $\tan \delta = G''/G'$ ) plot at 5 °C min<sup>-1</sup>.

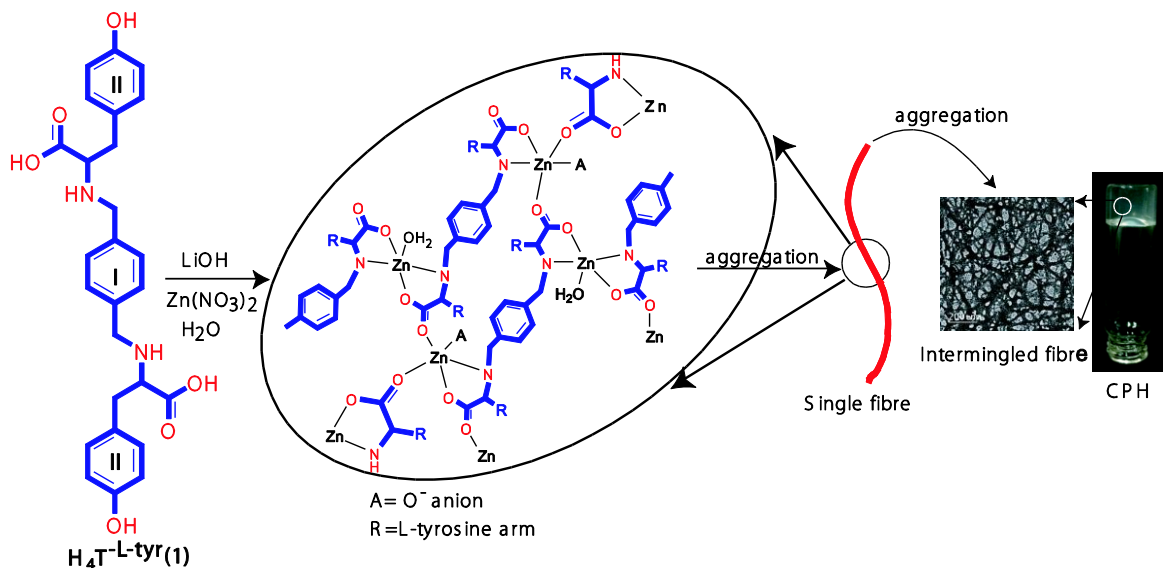

**Figure S23.** A schematic presentation of plausible mechanism behind metallohydrogel formation.
